# Supplementary material for: Total Synthesis of Fellutamide B and Deoxy-Fellutamides B, C, and D
Source: PubMed Central journal article supplement (PMC3736429; doi:10.3390/md11072382), 2013-07-08

# Supplementary Material

## Contents

|                                                                                                                    |           |
|--------------------------------------------------------------------------------------------------------------------|-----------|
| <b>Figure S1.</b> NMR spectra of final compounds ( <b>2</b> and <b>6–8</b> ).                                      | <b>2</b>  |
| <b>Figure S2.</b> NMR spectra of Mosher's esters ( <b>methyl ester-5</b> and <i>rac</i> - <b>methyl ester-5</b> ). | <b>10</b> |
| <b>Figure S3.</b> Comparison of NMR data for fellutamide B ( <b>2</b> ).                                           | <b>14</b> |
| <b>Figure S4.</b> Raw data for <i>in vitro</i> inhibition assays against <i>Mycobacterium tuberculosis</i> .       | <b>15</b> |

Figure S1. NMR spectra of final compounds (2 and 6–8).

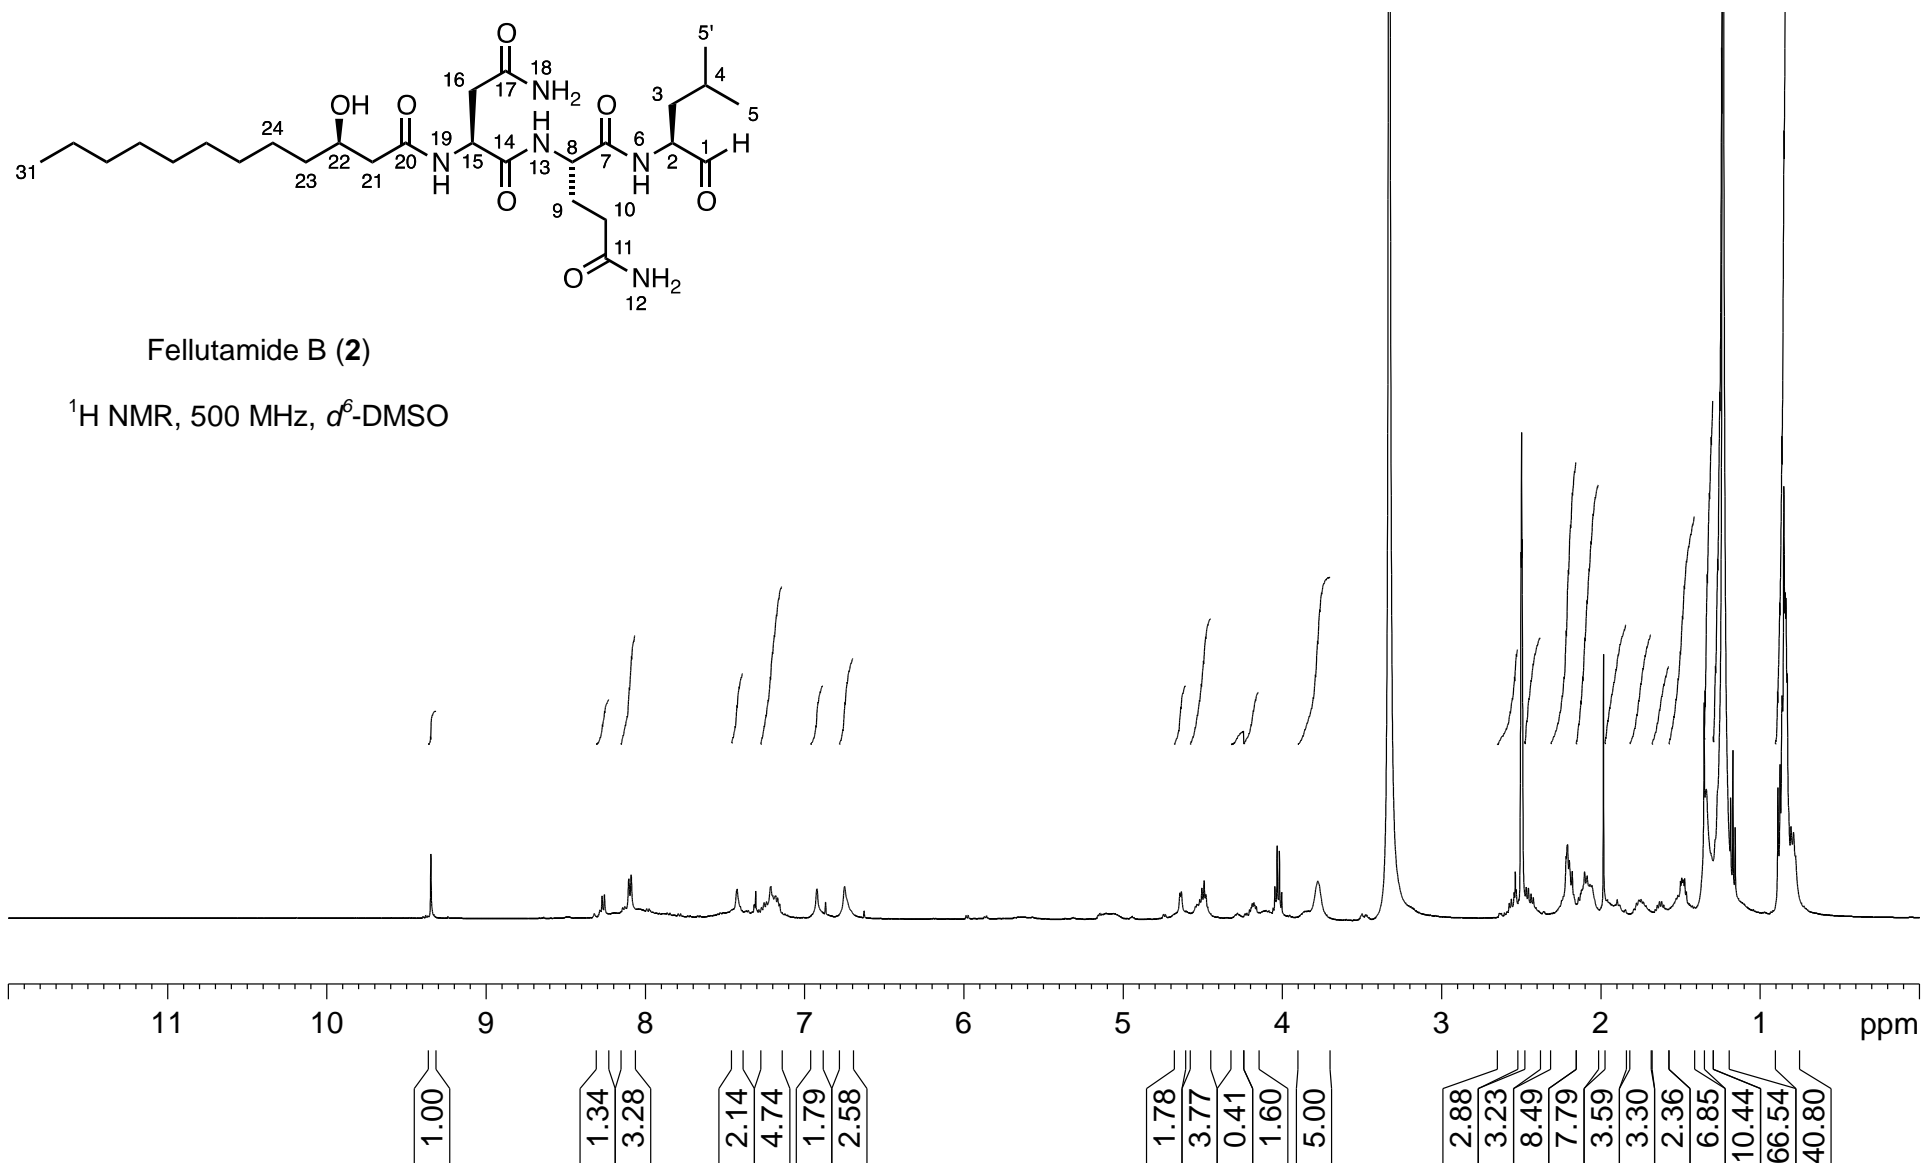

Figure S1. Cont.

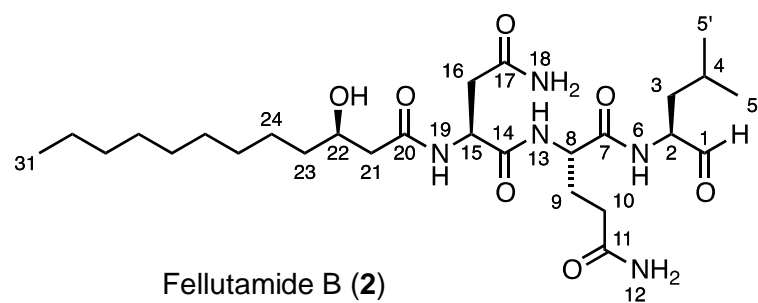

Fellutamide B (2)

 $^{13}\text{C}$  NMR, 125 MHz,  $d^6$ -DMSO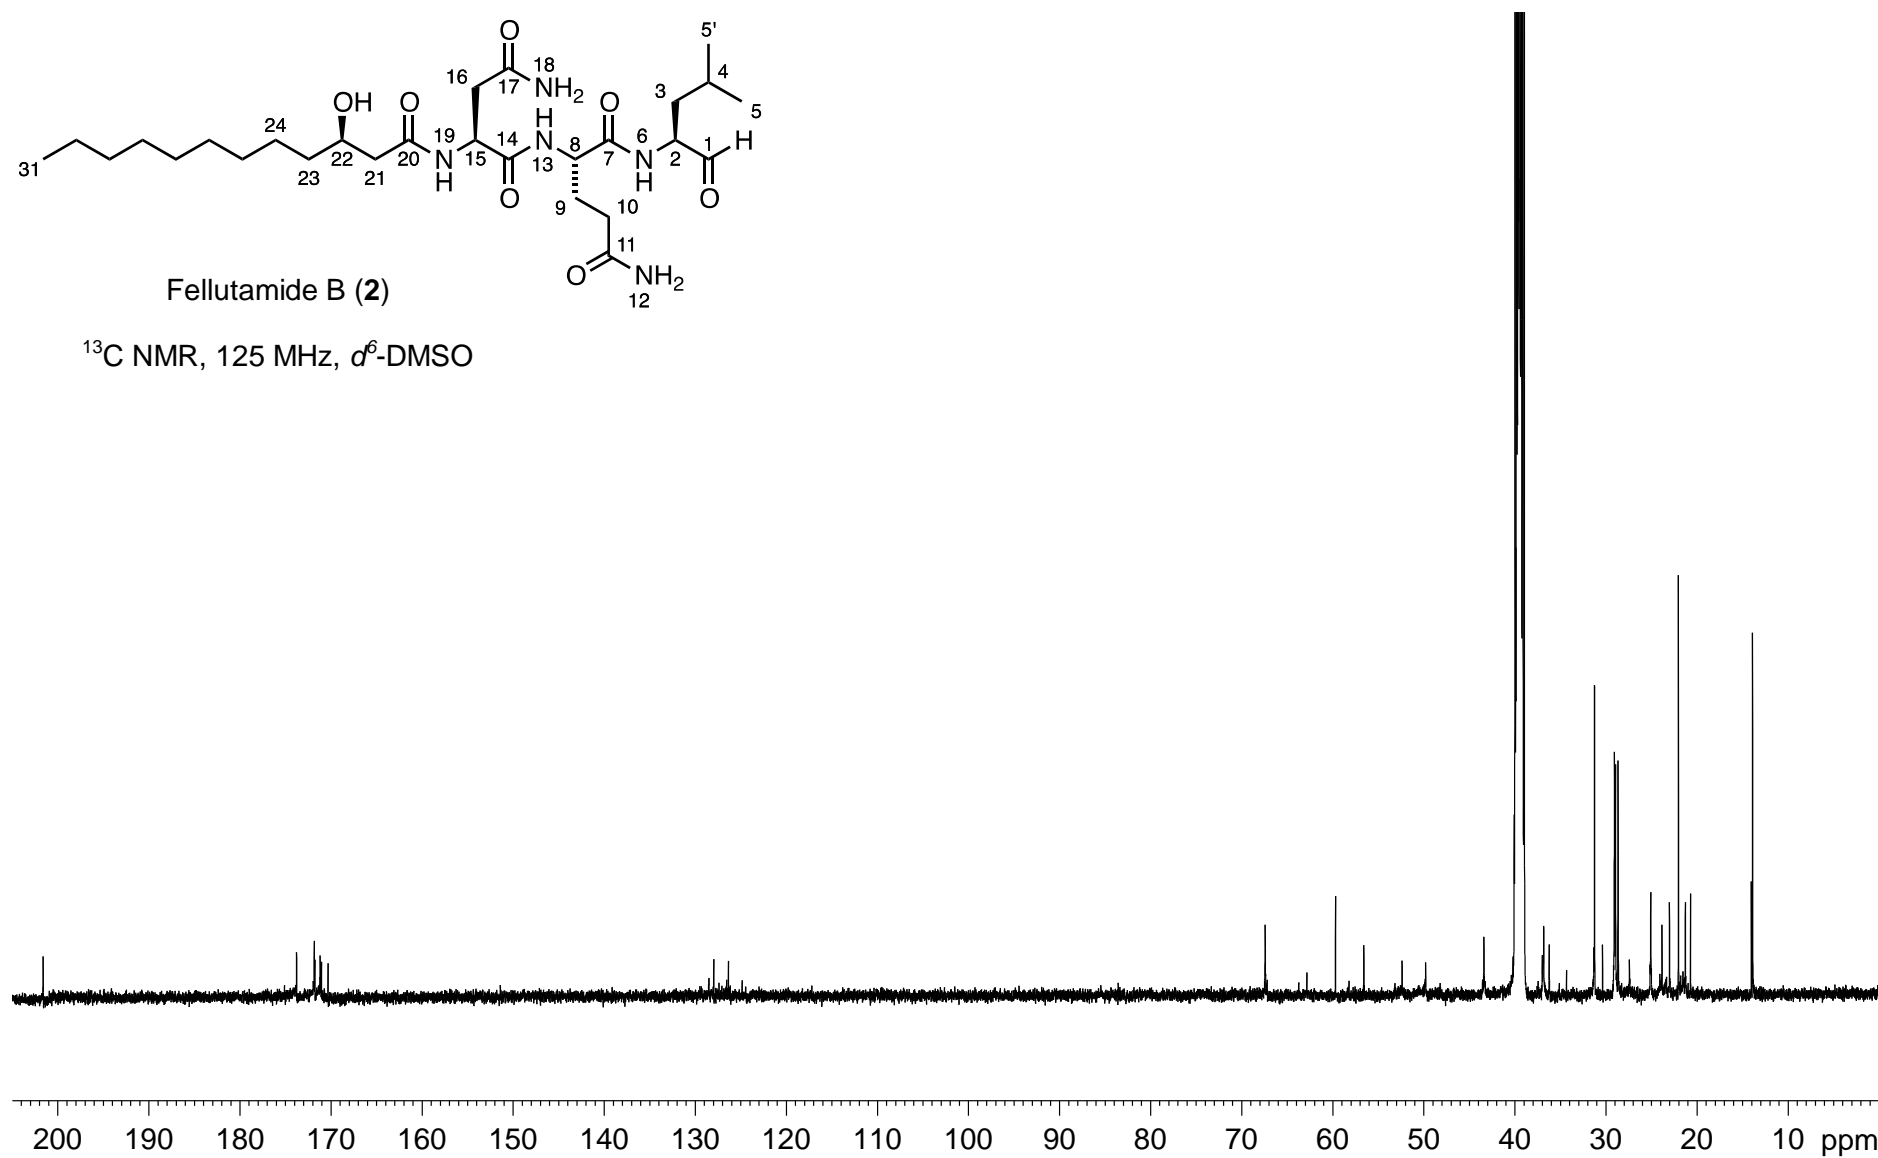

Figure S1. Cont.

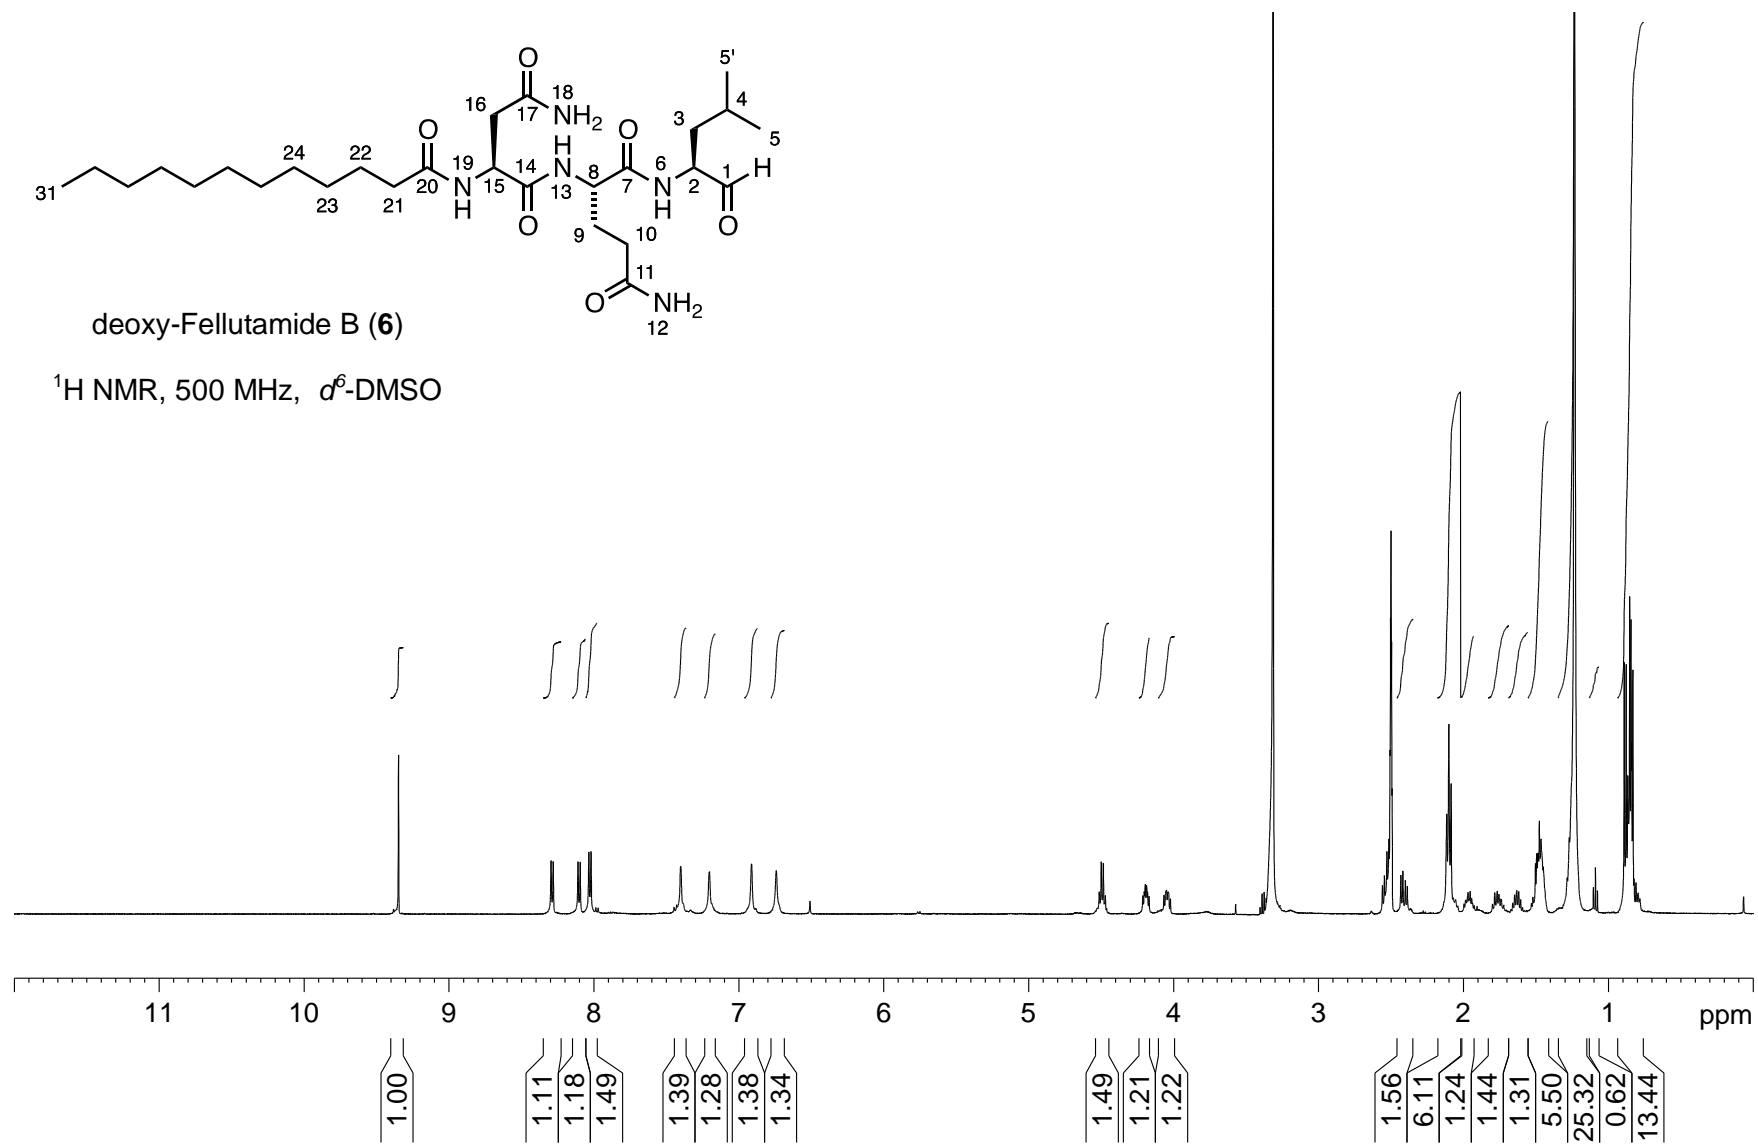

Figure S1. Cont.

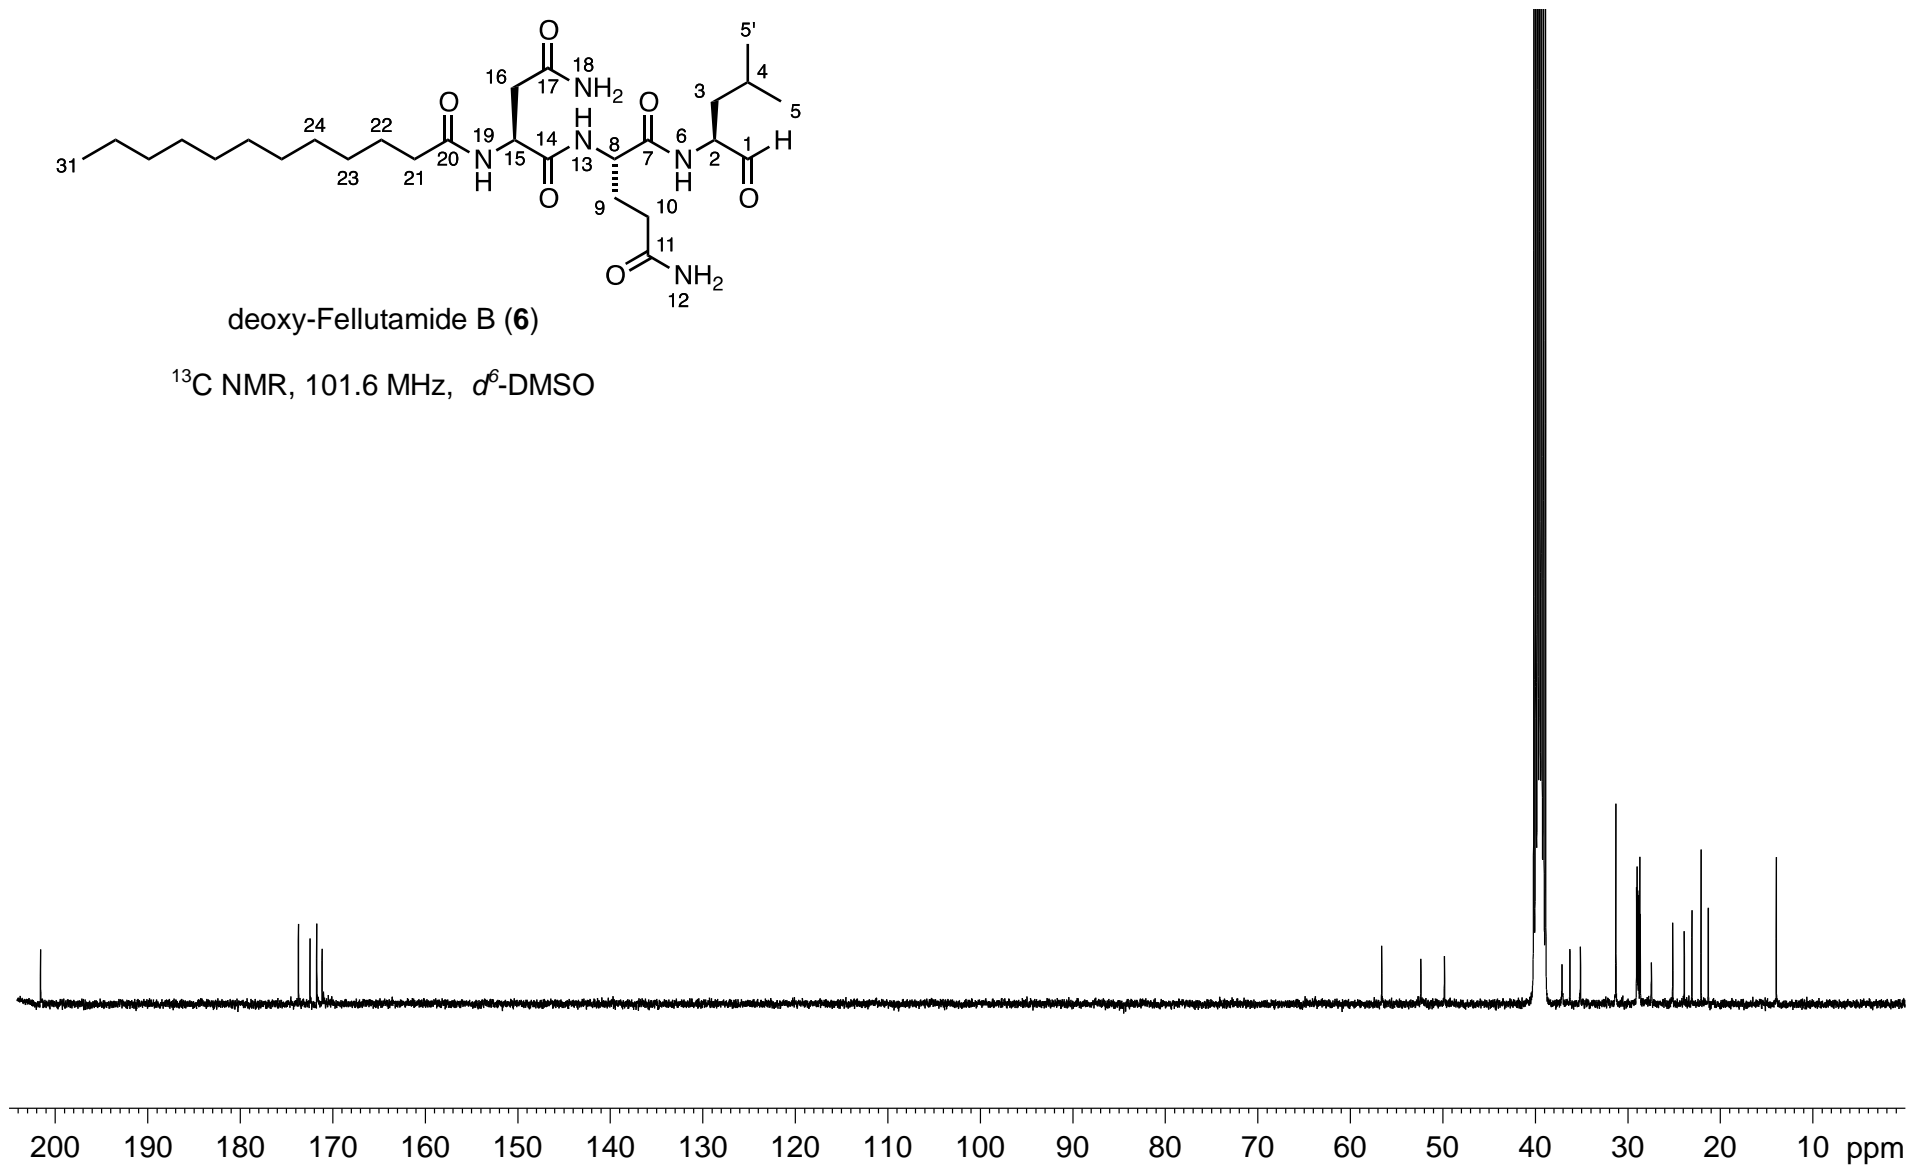

Figure S1. Cont.

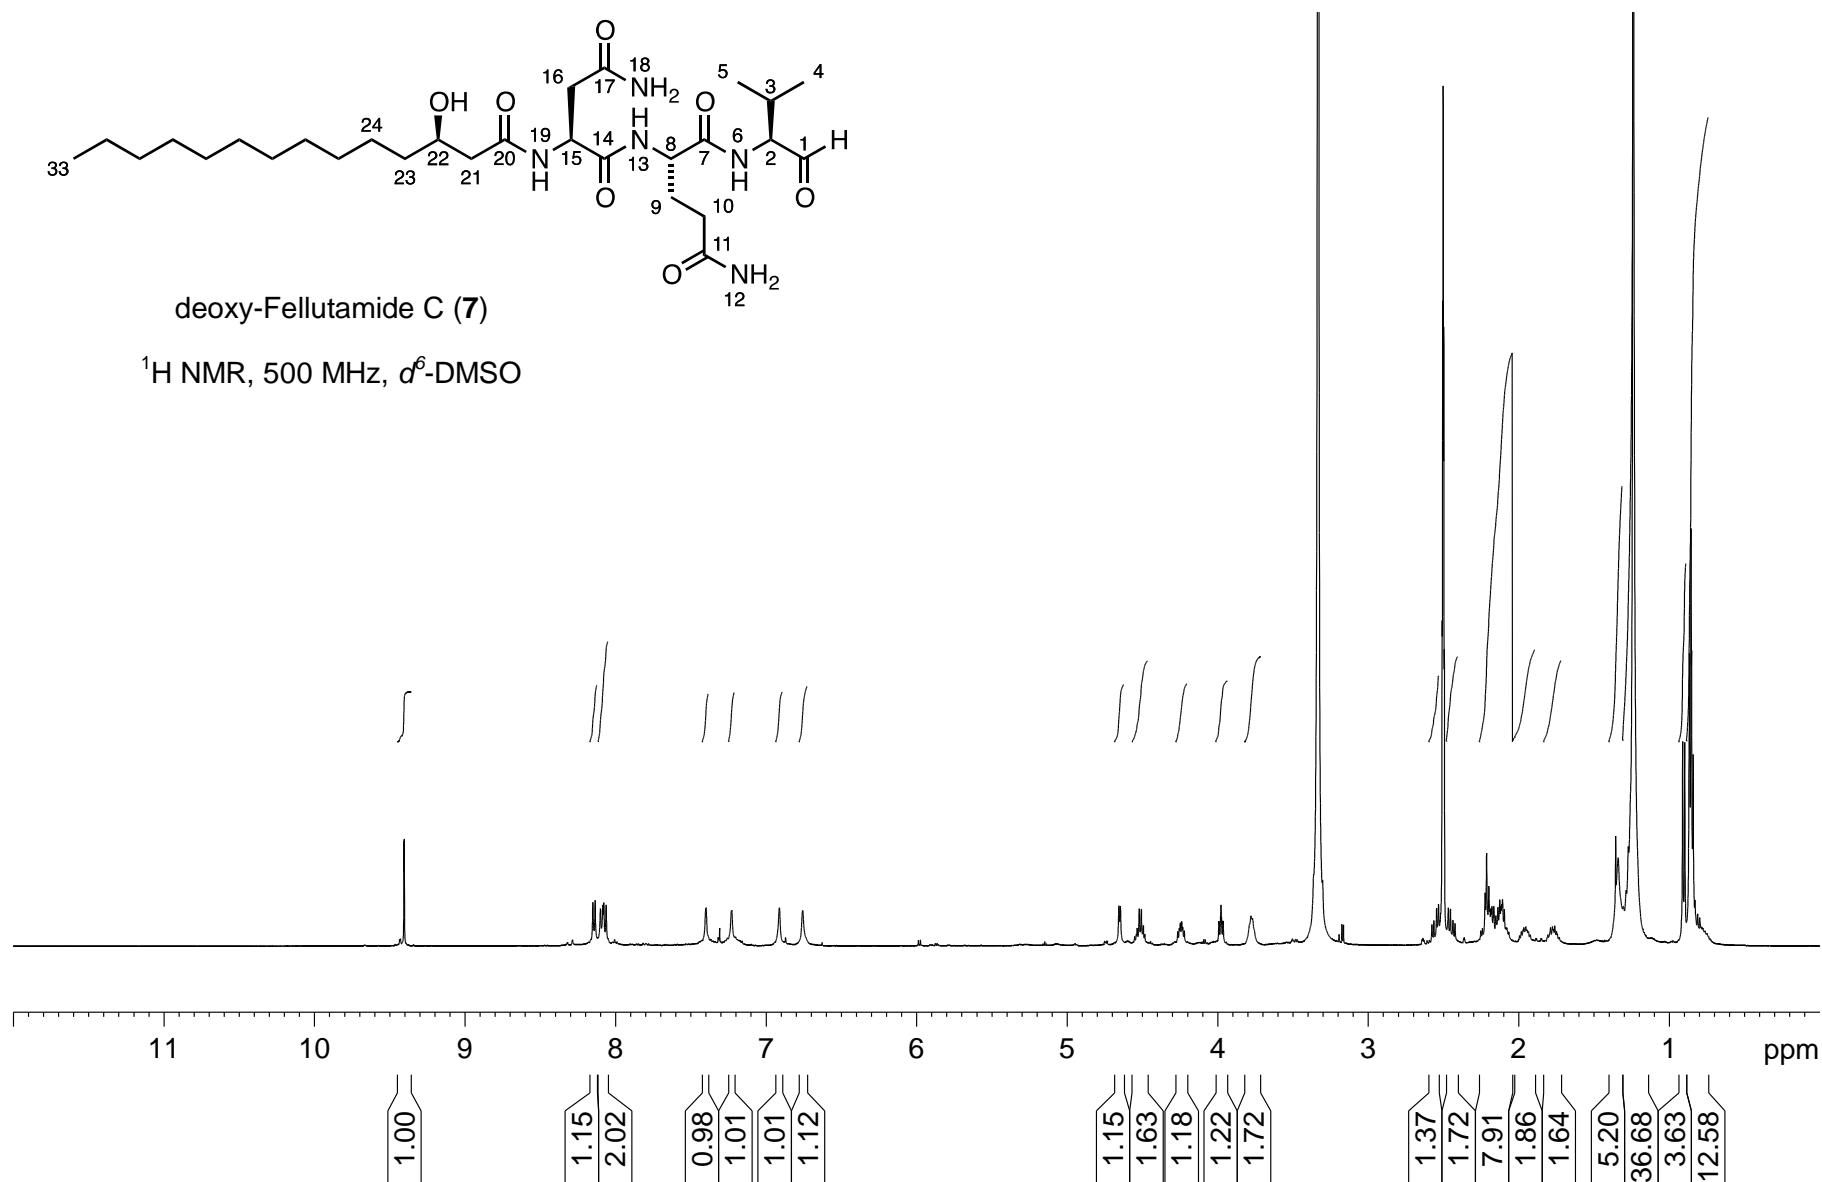

Figure S1. Cont.

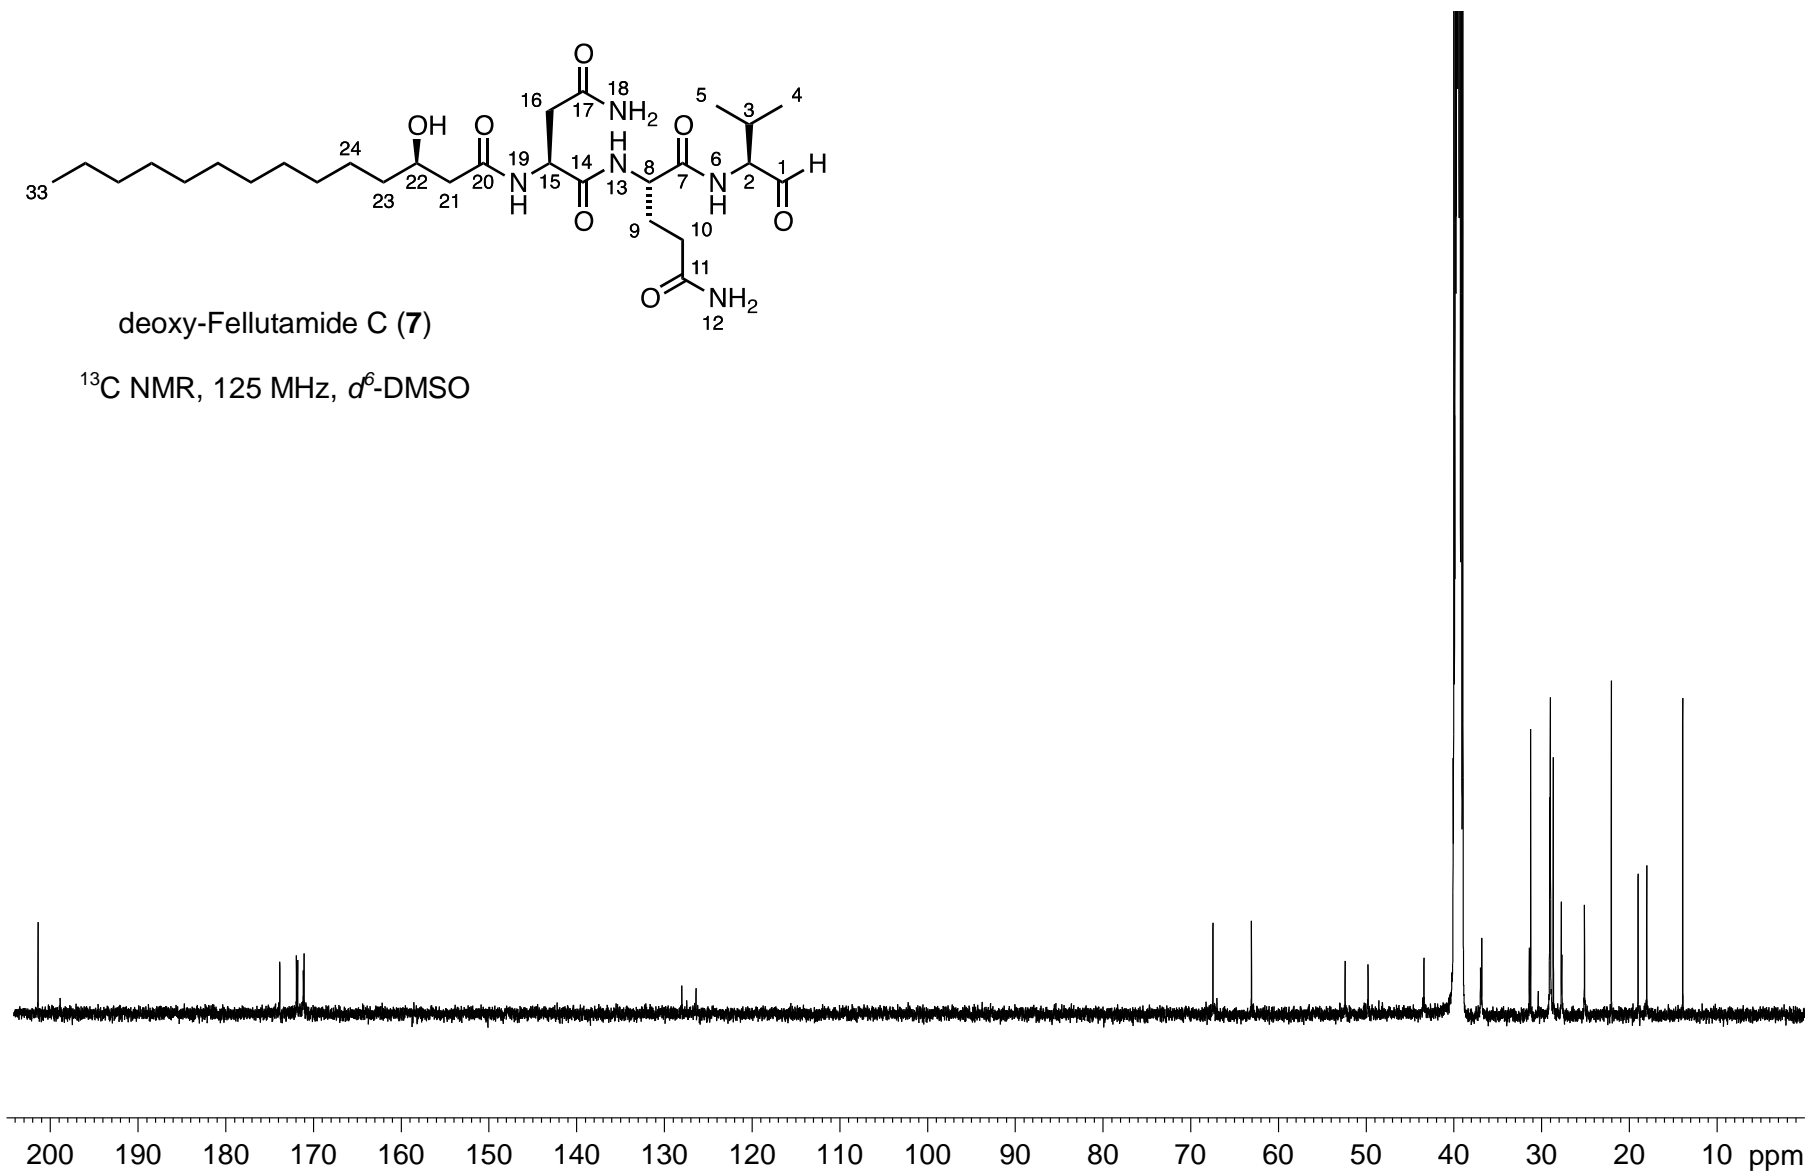

Figure S1. Cont.

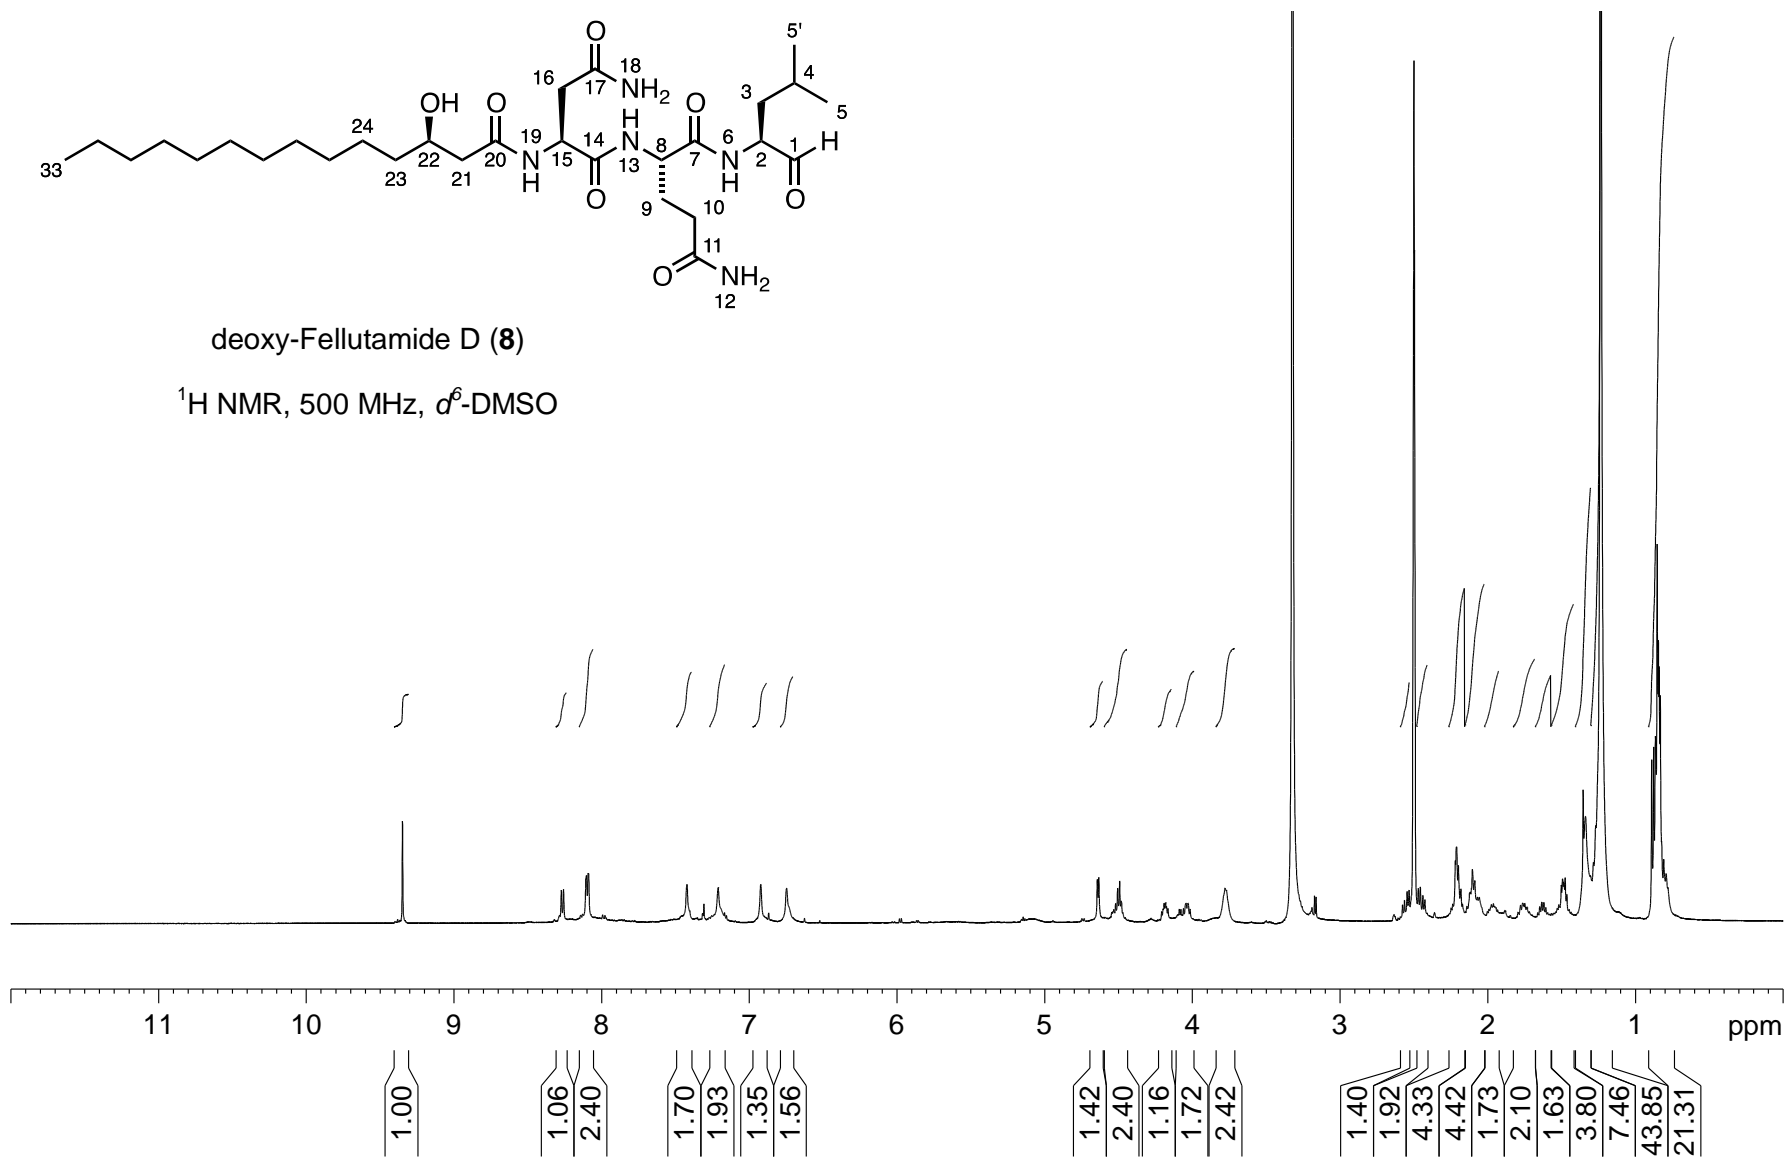



Figure S1. Cont.

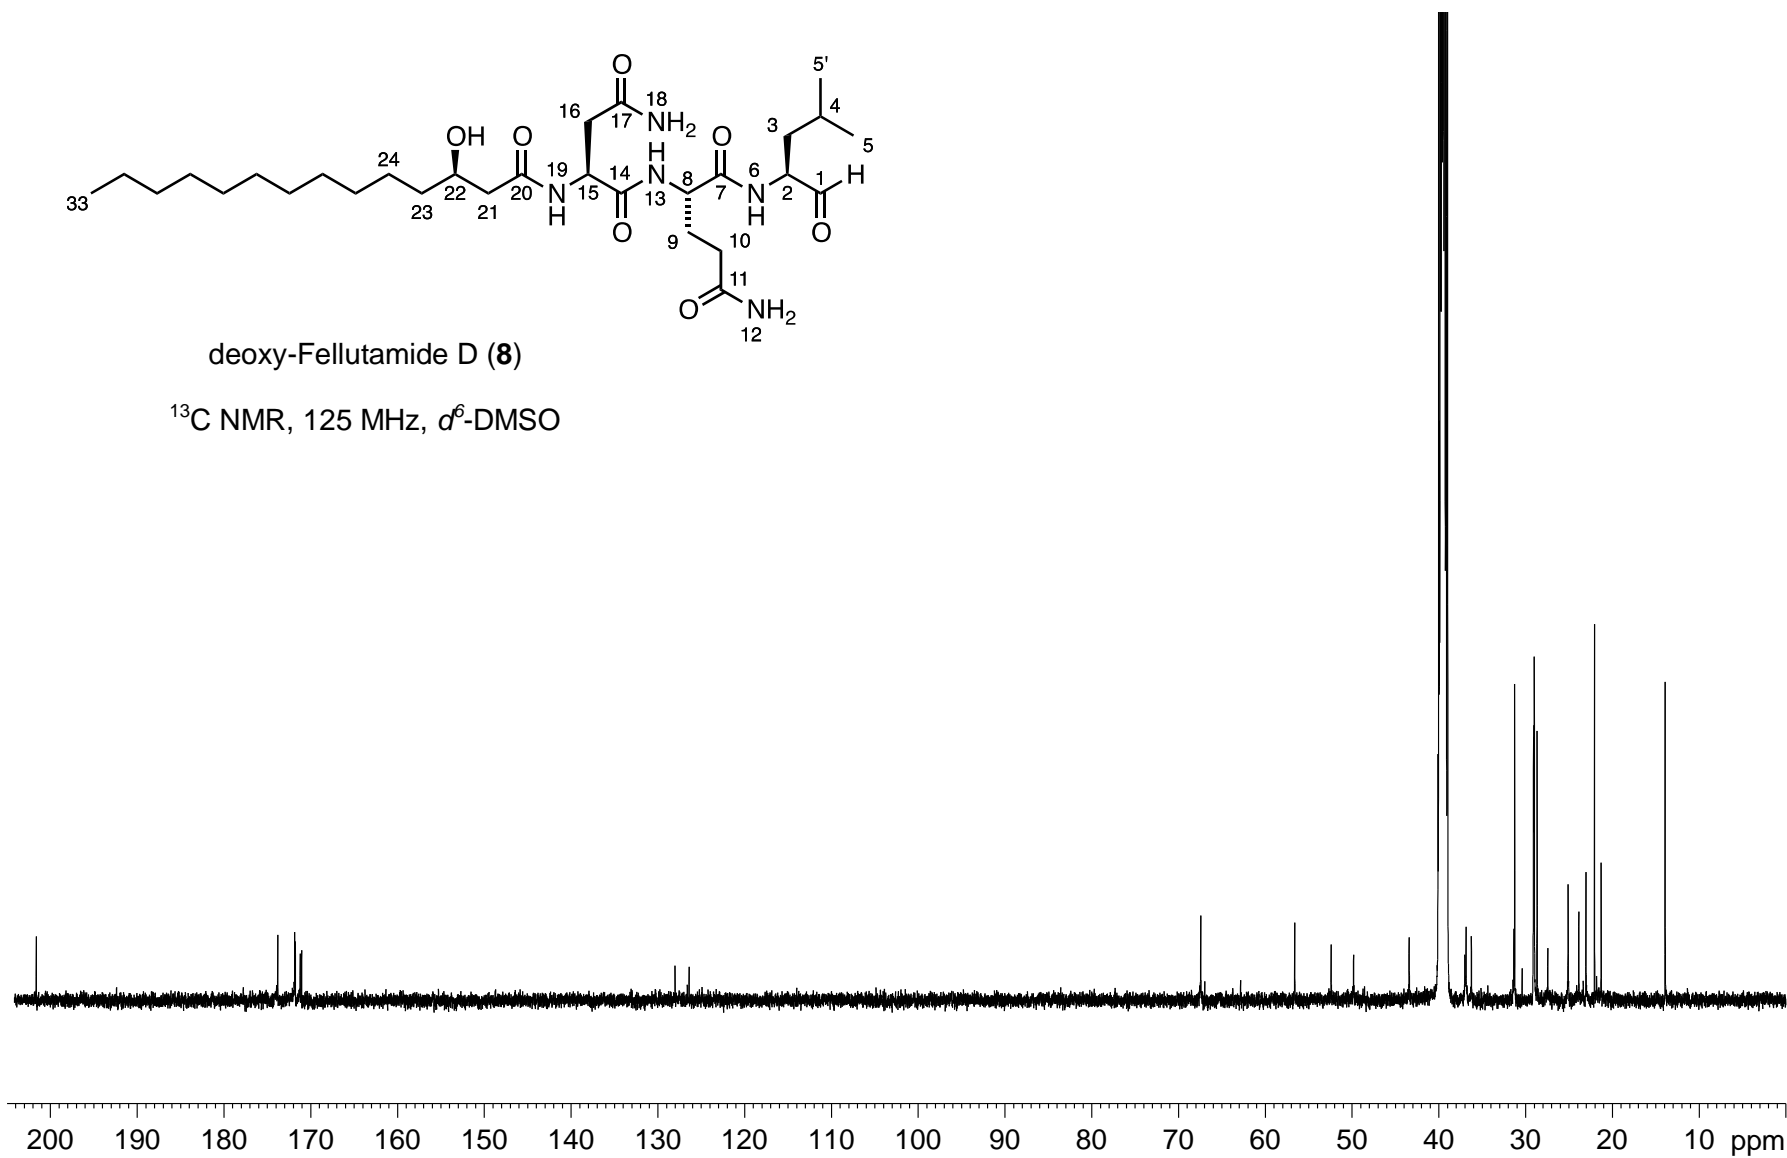

Figure S2. NMR spectra of Mosher's esters (**methyl ester-5** and *rac*-methyl ester-5).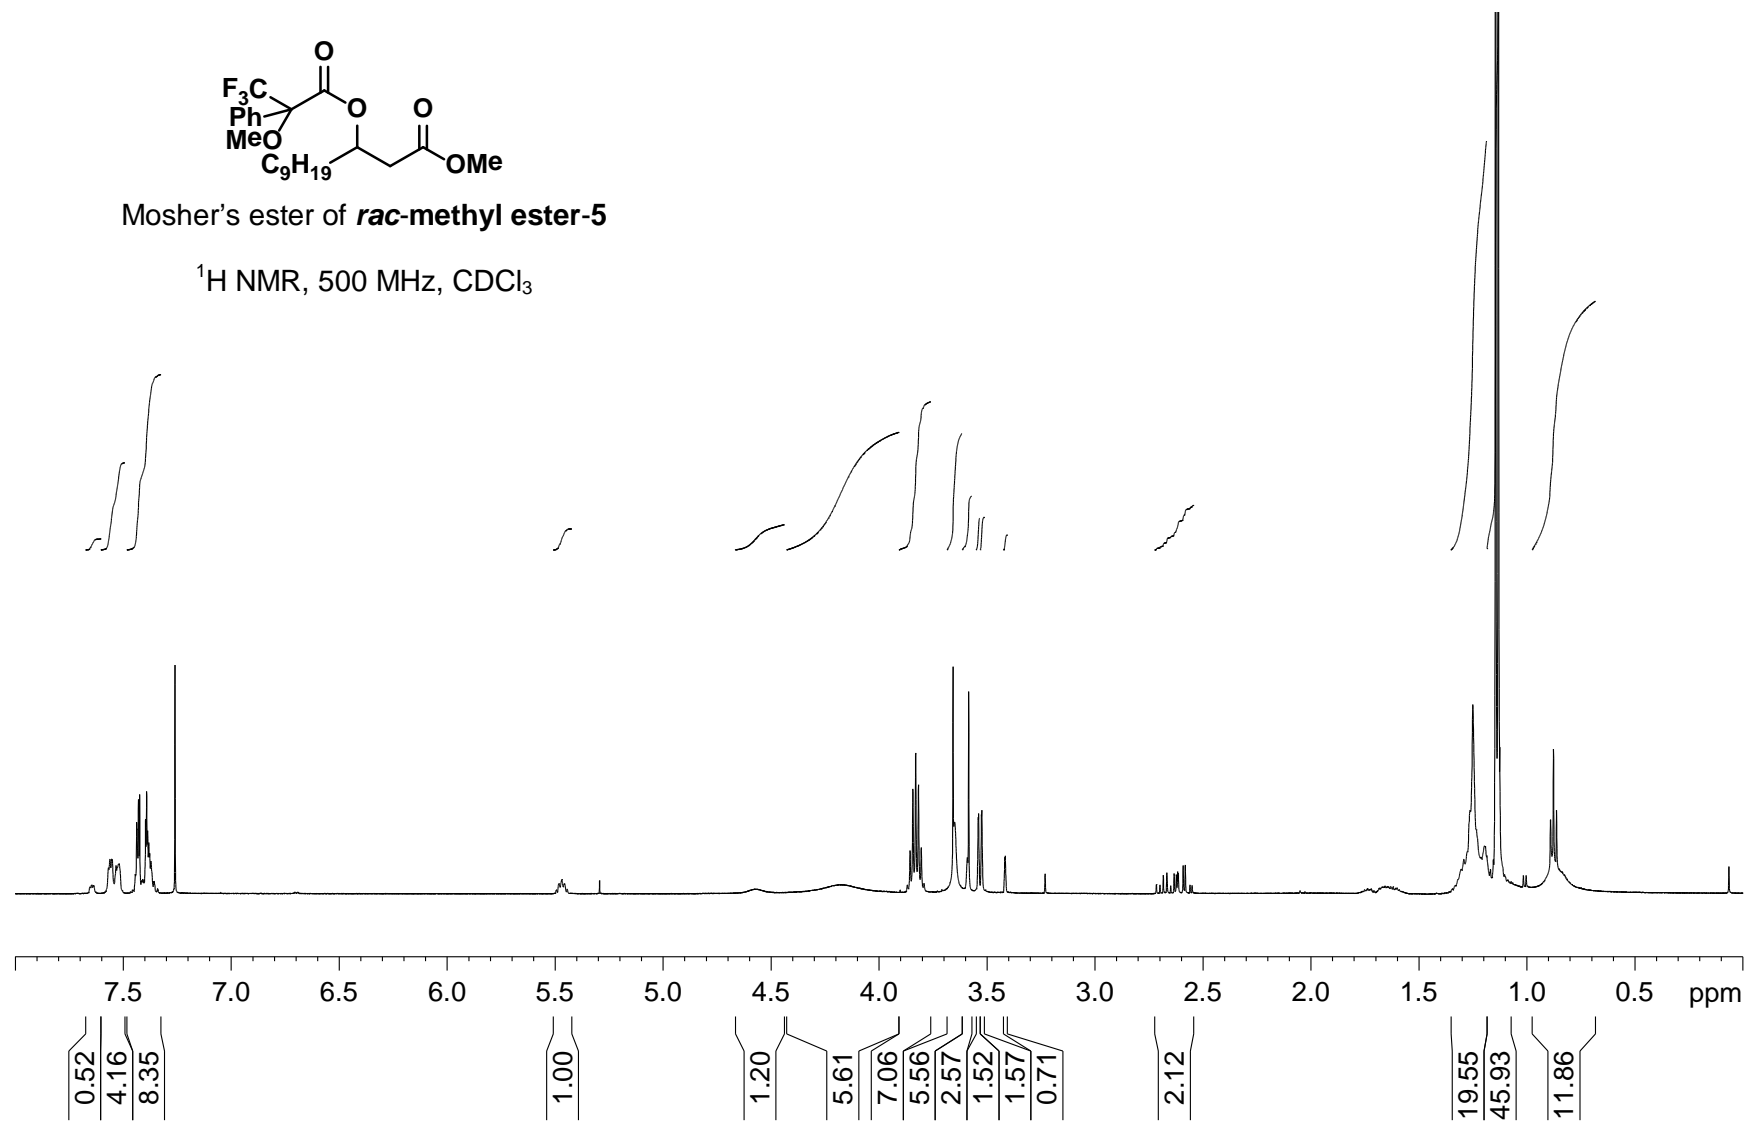

Figure S2. Cont.

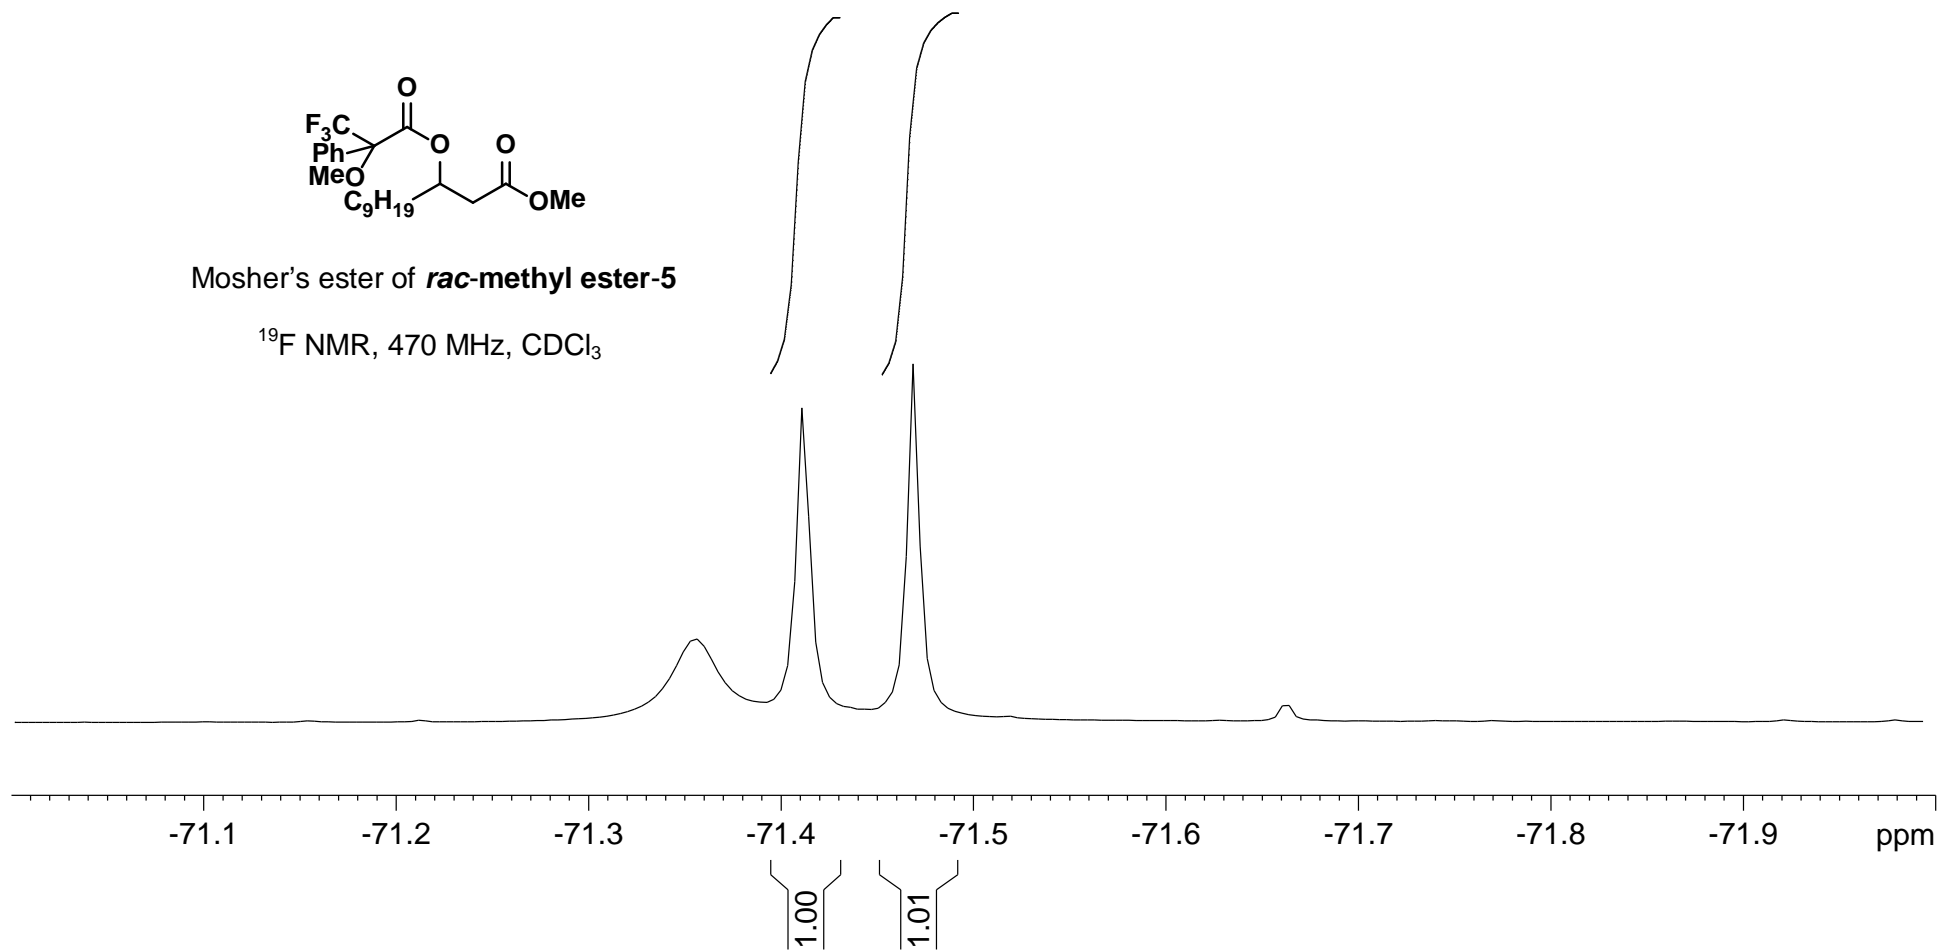

Figure S2. Cont.

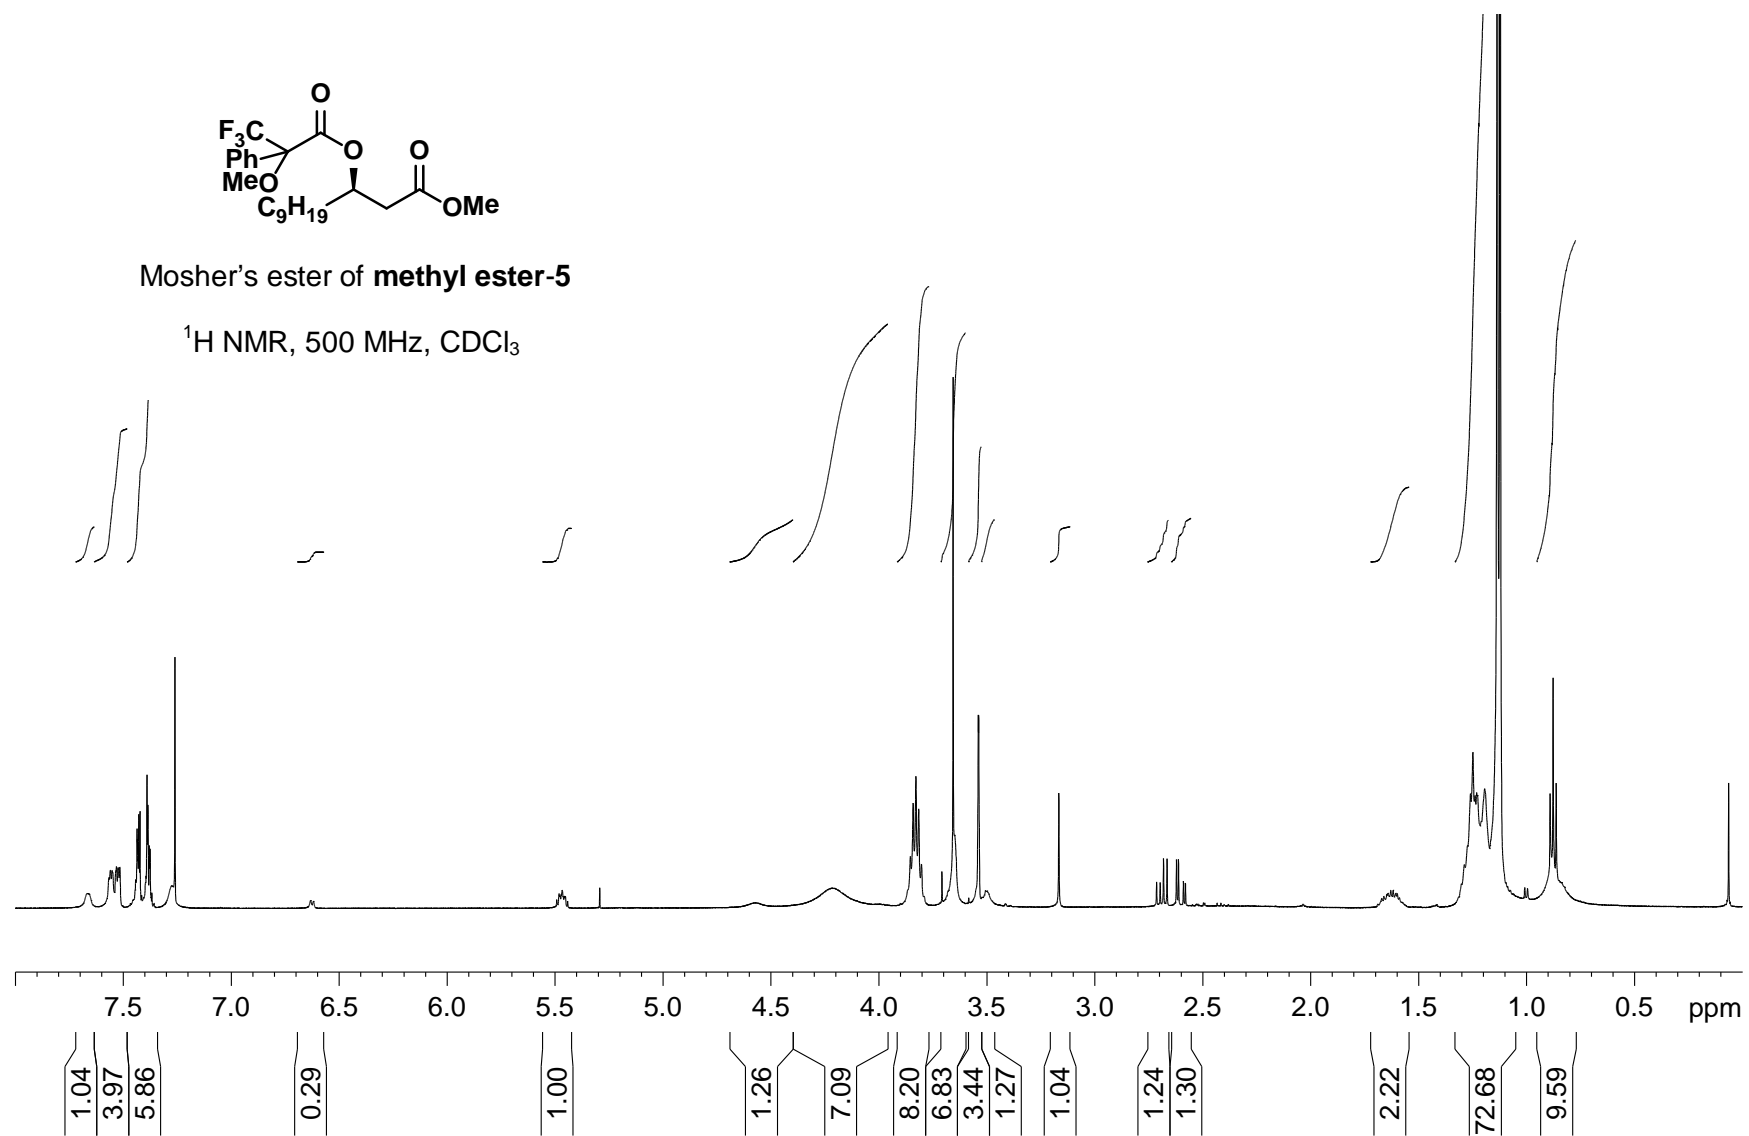

Figure S2. Cont.

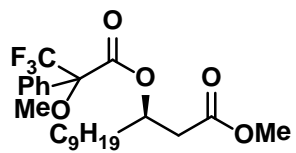Mosher's ester of **methyl ester-5** $^{19}\text{F}$  NMR, 470 MHz,  $\text{CDCl}_3$ 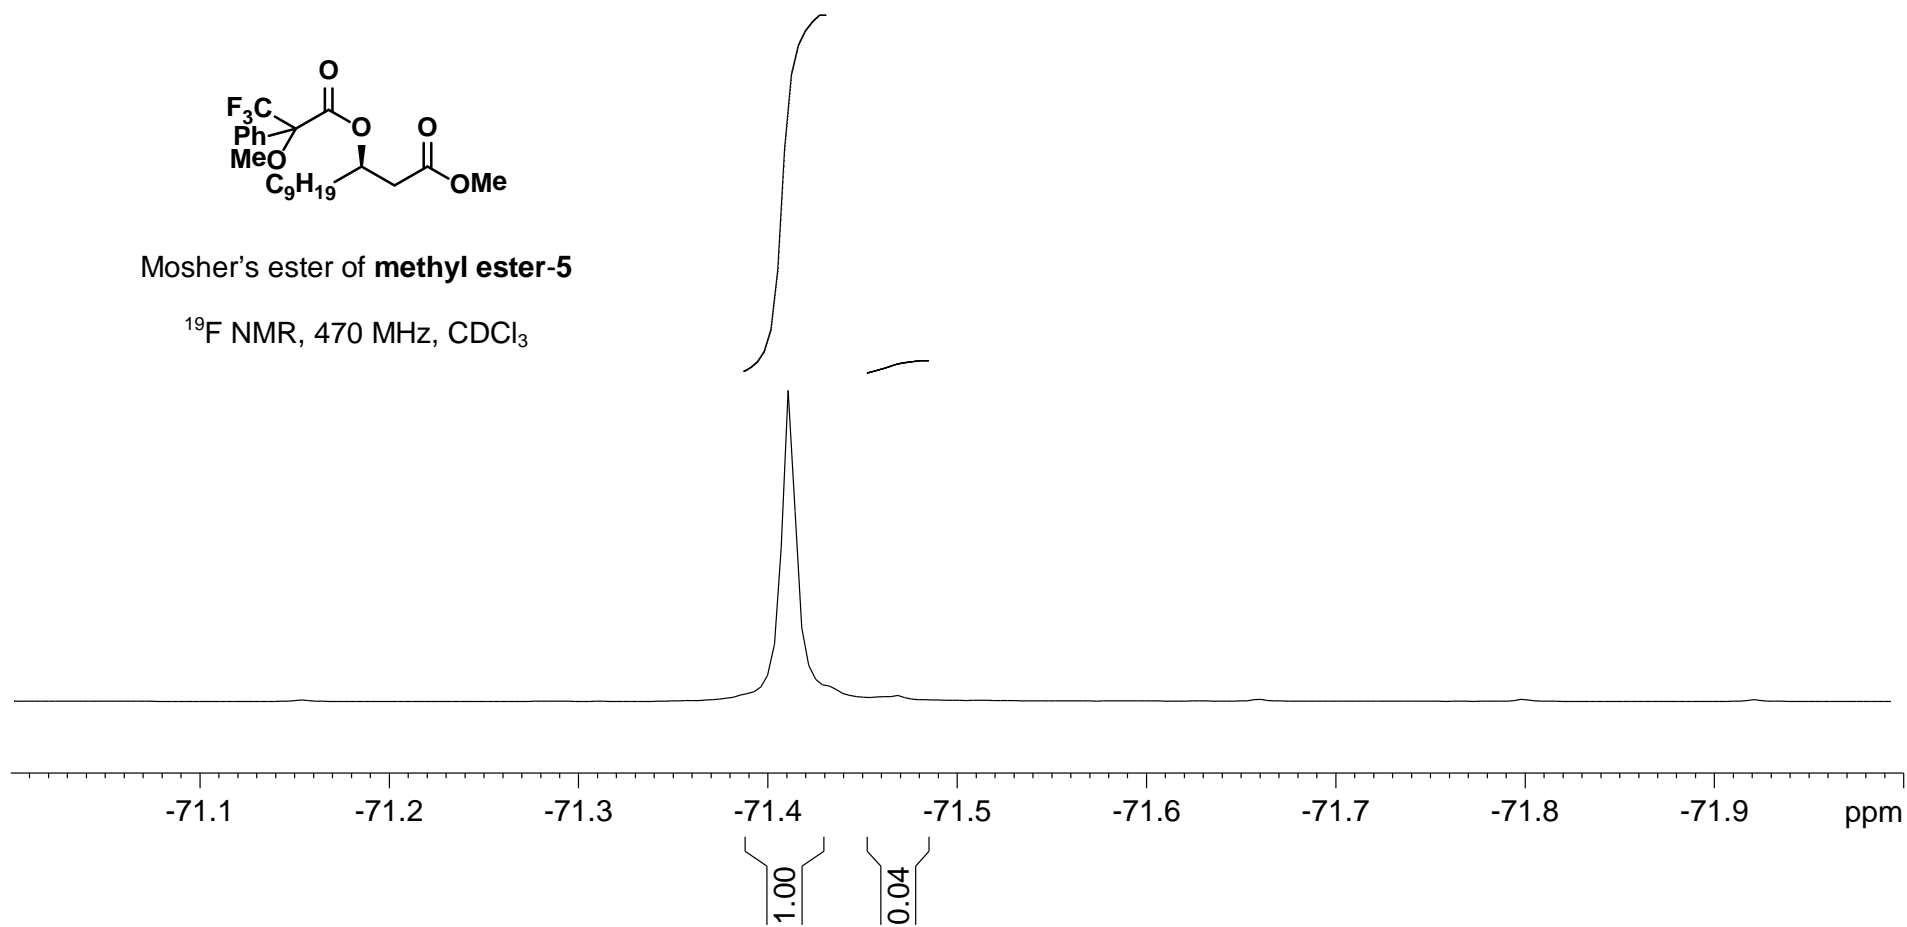

**Figure S3.** Comparison of  $^{13}\text{C}$  NMR data between synthesized and natural fellutamide B (**2**). Synthesised fellutamide B; Synthetic: 125 MHz,  $d_6$ -DMSO; Natural: 101.6 MHz,  $d_6$ -DMSO.

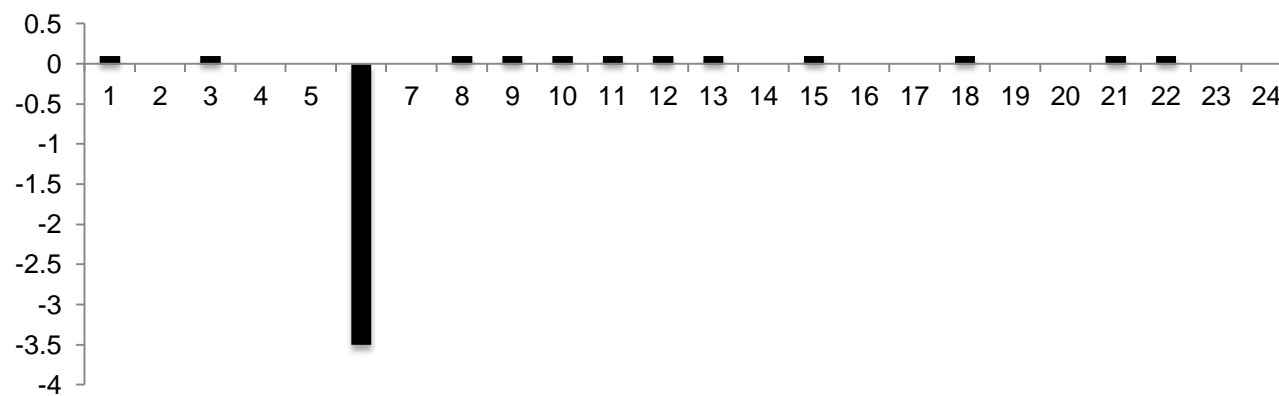

**Figure S4.** Raw data for *in vitro* inhibition assays against *Mycobacterium tuberculosis*.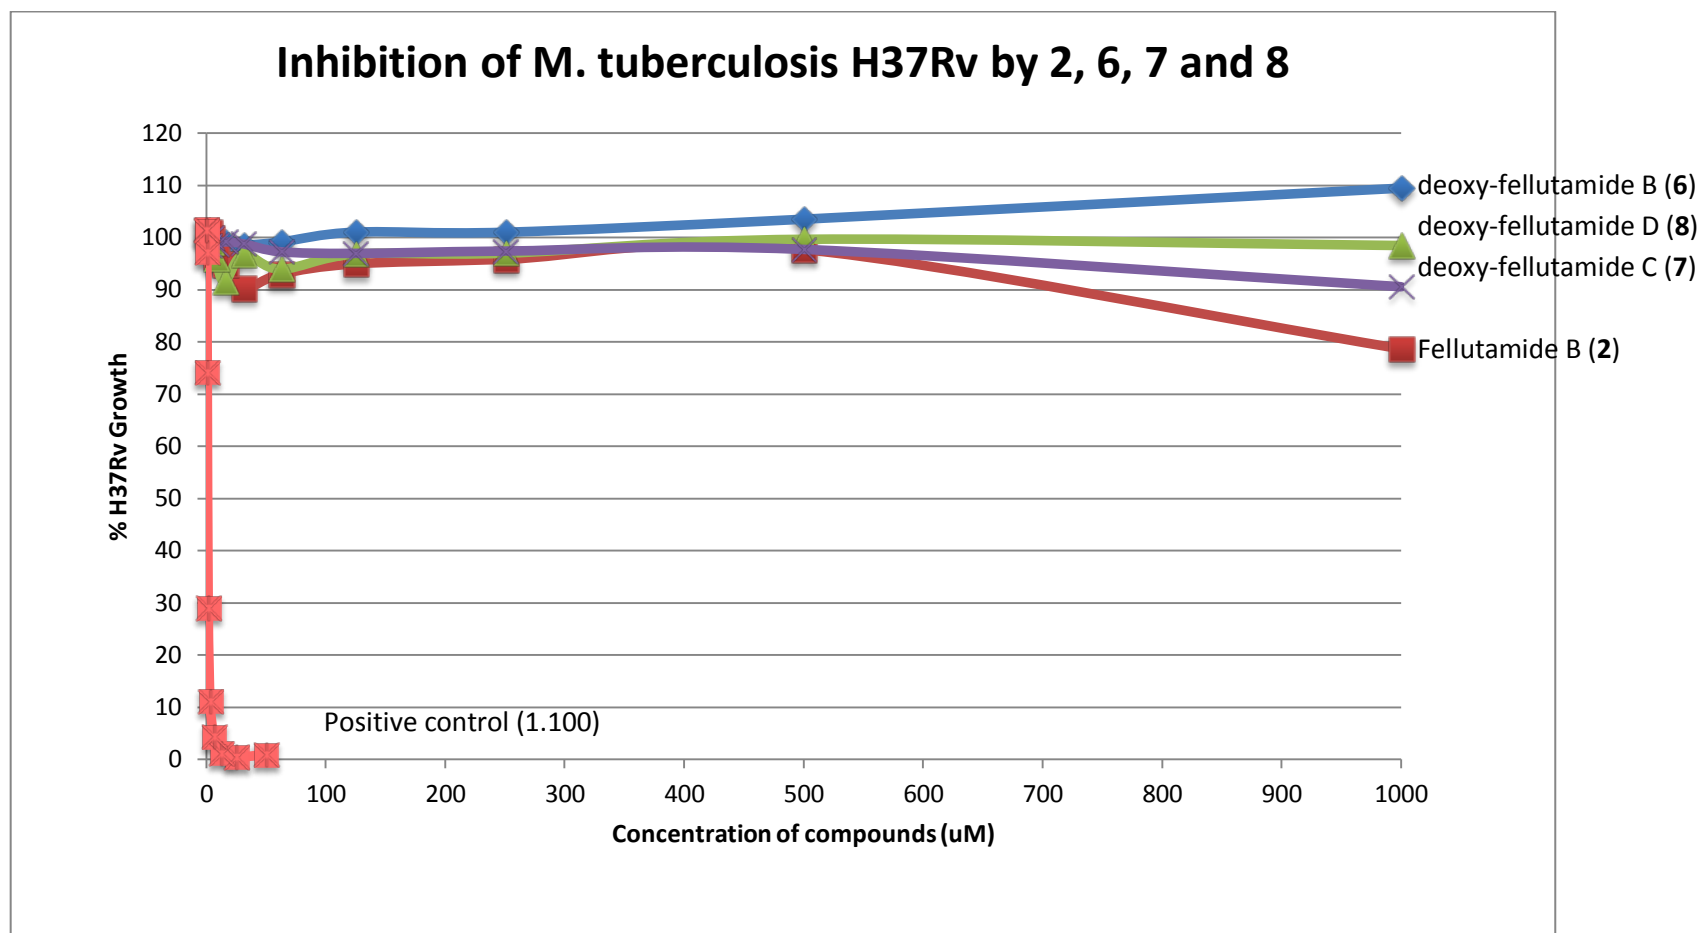

Supplement: marinedrugs-11-02382-s001.pdf [file marinedrugs-11-02382-s001.pdf]
