# Supplementary material for: Total Synthesis of Fellutamide B and Deoxy-Fellutamides B, C, and D
Source: MDPI journal article supplement (doi:10.3390/md11072382), 2013-07-08
Supplement: s2 [file s2]

marinedrugs-11-02382-s001.mol
  corina  04141405353D 1   1.00000     0.00000 
CORINA 3.49 0023  12.04.2013
 41 40  0  0  0  0  0  0  0  0999 V2000
   -4.5338   -2.1305    0.2016 C   0  0  0  0  0  0  0  0  0  0  0  0
   -3.0667   -2.4219    0.5236 C   0  0  0  0  0  0  0  0  0  0  0  0
   -2.2637   -2.4258   -0.7516 C   0  0  0  0  0  0  0  0  0  0  0  0
   -0.9375   -2.6622   -0.7122 N   0  0  0  0  0  0  0  0  0  0  0  0
   -0.1749   -2.7684   -1.9585 C   0  0  0  0  0  0  0  0  0  0  0  0
   -4.6523   -0.8069   -0.3238 O   0  0  0  0  0  0  0  0  0  0  0  0
   -2.8110   -2.2162   -1.8135 O   0  0  0  0  0  0  0  0  0  0  0  0
    1.2888   -2.4109   -1.6929 C   0  0  0  0  0  0  0  0  0  0  0  0
   -0.2605   -4.1793   -2.4811 C   0  0  0  0  0  0  0  0  0  0  0  0
    0.3690   -4.5137   -3.6250 N   0  0  0  0  0  0  0  0  0  0  0  0
    1.3817   -0.9753   -1.2440 C   0  0  0  0  0  0  0  0  0  0  0  0
    2.5654   -0.4694   -0.8445 N   0  0  0  0  0  0  0  0  0  0  0  0
    0.2858   -5.8852   -4.1330 C   0  0  0  0  0  0  0  0  0  0  0  0
    1.3606   -6.7434   -3.4628 C   0  0  0  0  0  0  0  0  0  0  0  0
    1.1080   -6.7911   -1.9545 C   0  0  0  0  0  0  0  0  0  0  0  0
   -0.0223   -6.8647   -6.3834 N   0  0  0  0  0  0  0  0  0  0  0  0
    0.5028   -5.8826   -5.6243 C   0  0  0  0  0  0  0  0  0  0  0  0
    2.2332   -7.5328   -1.2800 C   0  0  0  0  0  0  0  0  0  0  0  0
    2.2238   -7.7000    0.0574 N   0  0  0  0  0  0  0  0  0  0  0  0
   -1.5268   -5.4362   -7.9846 O   0  0  0  0  0  0  0  0  0  0  0  0
   -0.6726   -6.0522   -8.5757 C   0  0  0  0  0  0  0  0  0  0  0  0
    0.2870   -6.9296   -7.8139 C   0  0  0  0  0  0  0  0  0  0  0  0
   -0.5964   -5.9743   -9.6501 H   0  0  0  0  0  0  0  0  0  0  0  0
    0.3228   -9.8756  -10.2894 C   0  0  0  0  0  0  0  0  0  0  0  0
    0.5787   -8.4606   -9.7666 C   0  0  0  0  0  0  0  0  0  0  0  0
    0.1527   -8.3742   -8.2997 C   0  0  0  0  0  0  0  0  0  0  0  0
    2.0689   -8.1349   -9.8850 C   0  0  0  0  0  0  0  0  0  0  0  0
    1.1499   -4.9967   -6.1413 O   0  0  0  0  0  0  0  0  0  0  0  0
    1.3132   -8.0684   -3.9958 O   0  0  0  0  0  0  0  0  0  0  0  0
    3.1471   -7.9793   -1.9405 O   0  0  0  0  0  0  0  0  0  0  0  0
   -0.8959   -5.0140   -1.8724 O   0  0  0  0  0  0  0  0  0  0  0  0
    0.3914   -0.2752   -1.2421 O   0  0  0  0  0  0  0  0  0  0  0  0
  -14.6378   -2.0519    5.2107 C   0  0  0  0  0  0  0  0  0  0  0  0
  -13.8023   -1.9331    3.9346 C   0  0  0  0  0  0  0  0  0  0  0  0
  -12.3207   -2.1012    4.2775 C   0  0  0  0  0  0  0  0  0  0  0  0
  -11.4851   -1.9824    3.0013 C   0  0  0  0  0  0  0  0  0  0  0  0
  -10.0036   -2.1506    3.3443 C   0  0  0  0  0  0  0  0  0  0  0  0
   -9.1680   -2.0318    2.0681 C   0  0  0  0  0  0  0  0  0  0  0  0
   -7.6865   -2.1999    2.4110 C   0  0  0  0  0  0  0  0  0  0  0  0
   -6.8509   -2.0811    1.1349 C   0  0  0  0  0  0  0  0  0  0  0  0
   -5.3694   -2.2493    1.4778 C   0  0  0  0  0  0  0  0  0  0  0  0
  1  2  1  0      
  2  3  1  0      
  3  4  1  0      
  4  5  1  0      
  1  6  1  0      
  3  7  2  0      
  5  8  1  0      
  5  9  1  0      
  9 10  1  0      
  8 11  1  0      
 11 12  1  0      
 10 13  1  0      
 13 14  1  0      
 14 15  1  0      
 16 17  1  0      
 17 13  1  0      
 15 18  1  0      
 18 19  1  0      
 20 21  2  0      
 21 22  1  0      
 22 16  1  0      
 21 23  1  0      
 24 25  1  0      
 25 26  1  0      
 25 27  1  0      
 22 26  1  0      
 17 28  2  0      
 14 29  1  0      
 18 30  2  0      
  9 31  2  0      
 11 32  2  0      
  1 41  1  0      
 33 34  1  0      
 34 35  1  0      
 35 36  1  0      
 36 37  1  0      
 37 38  1  0      
 38 39  1  0      
 39 40  1  0      
 40 41  1  0      
M  STY  1   1 SUP
M  SLB  1   1   1
M  SAL   1  9  33  34  35  36  37  38  39  40  41
M  SBL   1  1  32
M  SMT   1 C9H19
M  SBV   1 32   -4.6044    5.2388
M  END
$$$$
