# Supplementary material for: Total Synthesis of Fellutamide B and Deoxy-Fellutamides B, C, and D
Source: MDPI journal article supplement (doi:10.3390/md11072382), 2013-07-08
Supplement: s3 [file s3]

marinedrugs-11-02382-s001.mol
  ChemDraw01201408362D

 41 40  0  0  0  0  0  0  0  0999 V2000
   -1.0717    0.4125    0.0000 C   0  0  0  0  0  0  0  0  0  0  0  0
   -0.3572    0.0000    0.0000 C   0  0  0  0  0  0  0  0  0  0  0  0
    0.3572    0.4125    0.0000 C   0  0  0  0  0  0  0  0  0  0  0  0
    1.0717    0.0000    0.0000 N   0  0  0  0  0  0  0  0  0  0  0  0
    1.7862    0.4125    0.0000 C   0  0  0  0  0  0  0  0  0  0  0  0
   -1.0717    1.2375    0.0000 O   0  0  0  0  0  0  0  0  0  0  0  0
    0.3572    1.2375    0.0000 O   0  0  0  0  0  0  0  0  0  0  0  0
    1.7862    1.2375    0.0000 C   0  0  0  0  0  0  0  0  0  0  0  0
    2.5006    0.0000    0.0000 C   0  0  0  0  0  0  0  0  0  0  0  0
    3.2151    0.4125    0.0000 N   0  0  0  0  0  0  0  0  0  0  0  0
    2.5006    1.6500    0.0000 C   0  0  0  0  0  0  0  0  0  0  0  0
    3.2151    1.2375    0.0000 N   0  0  0  0  0  0  0  0  0  0  0  0
    3.9296    0.0000    0.0000 C   0  0  0  0  0  0  0  0  0  0  0  0
    3.9296   -0.8250    0.0000 C   0  0  0  0  0  0  0  0  0  0  0  0
    4.6441   -1.2375    0.0000 C   0  0  0  0  0  0  0  0  0  0  0  0
    5.3585    0.0000    0.0000 N   0  0  0  0  0  0  0  0  0  0  0  0
    4.6441    0.4125    0.0000 C   0  0  0  0  0  0  0  0  0  0  0  0
    4.6441   -2.0625    0.0000 C   0  0  0  0  0  0  0  0  0  0  0  0
    5.3585   -2.4750    0.0000 N   0  0  0  0  0  0  0  0  0  0  0  0
    6.7875   -0.8250    0.0000 O   0  0  0  0  0  0  0  0  0  0  0  0
    6.7875    0.0000    0.0000 C   0  0  0  0  0  0  0  0  0  0  0  0
    6.0730    0.4125    0.0000 C   0  0  0  0  0  0  0  0  0  0  0  0
    7.5019    0.4125    0.0000 H   0  0  0  0  0  0  0  0  0  0  0  0
    7.5019    1.2375    0.0000 C   0  0  0  0  0  0  0  0  0  0  0  0
    6.7875    1.6500    0.0000 C   0  0  0  0  0  0  0  0  0  0  0  0
    6.0730    1.2375    0.0000 C   0  0  0  0  0  0  0  0  0  0  0  0
    6.7875    2.4750    0.0000 C   0  0  0  0  0  0  0  0  0  0  0  0
    4.6441    1.2375    0.0000 O   0  0  0  0  0  0  0  0  0  0  0  0
    3.2151   -1.2375    0.0000 O   0  0  0  0  0  0  0  0  0  0  0  0
    3.9296   -2.4750    0.0000 O   0  0  0  0  0  0  0  0  0  0  0  0
    2.5006   -0.8250    0.0000 O   0  0  0  0  0  0  0  0  0  0  0  0
    2.5006    2.4750    0.0000 O   0  0  0  0  0  0  0  0  0  0  0  0
   -7.5019    0.0000    0.0000 C   0  0  0  0  0  0  0  0  0  0  0  0
   -6.7875    0.4125    0.0000 C   0  0  0  0  0  0  0  0  0  0  0  0
   -6.0730    0.0000    0.0000 C   0  0  0  0  0  0  0  0  0  0  0  0
   -5.3585    0.4125    0.0000 C   0  0  0  0  0  0  0  0  0  0  0  0
   -4.6441    0.0000    0.0000 C   0  0  0  0  0  0  0  0  0  0  0  0
   -3.9296    0.4125    0.0000 C   0  0  0  0  0  0  0  0  0  0  0  0
   -3.2151    0.0000    0.0000 C   0  0  0  0  0  0  0  0  0  0  0  0
   -2.5006    0.4125    0.0000 C   0  0  0  0  0  0  0  0  0  0  0  0
   -1.7862    0.0000    0.0000 C   0  0  0  0  0  0  0  0  0  0  0  0
  1  2  1  0      
  2  3  1  0      
  3  4  1  0      
  4  5  1  0      
  1  6  1  1      
  3  7  2  0      
  5  8  1  1      
  5  9  1  0      
  9 10  1  0      
  8 11  1  0      
 11 12  1  0      
 10 13  1  6      
 13 14  1  0      
 14 15  1  0      
 16 17  1  0      
 17 13  1  0      
 15 18  1  0      
 18 19  1  0      
 20 21  2  0      
 21 22  1  0      
 22 16  1  0      
 21 23  1  0      
 24 25  1  0      
 25 26  1  0      
 25 27  1  0      
 22 26  1  1      
 17 28  2  0      
 14 29  1  1      
 18 30  2  0      
  9 31  2  0      
 11 32  2  0      
  1 41  1  0      
 33 34  1  0      
 34 35  1  0      
 35 36  1  0      
 36 37  1  0      
 37 38  1  0      
 38 39  1  0      
 39 40  1  0      
 40 41  1  0      
M  STY  1   1 SUP
M  SLB  1   1   1
M  SAL   1  9  33  34  35  36  37  38  39  40  41
M  SBL   1  1  32
M  SMT   1 C9H19
M  SBV   1 32   -4.6044    5.2388
M  END
