# Supplementary material for: Total Synthesis of Fellutamide B and Deoxy-Fellutamides B, C, and D
Source: MDPI journal article supplement (doi:10.3390/md11072382), 2013-07-08
Supplement: s6 [file s6]

marinedrugs-11-02382-s003.mol
  corina  04141405353D 1   1.00000     0.00000 
CORINA 3.49 0023  12.04.2013
 42 41  0  0  0  0  0  0  0  0999 V2000
   -2.4540   -0.3270   -0.2756 C   0  0  0  0  0  0  0  0  0  0  0  0
   -1.0937   -0.9946   -0.0638 C   0  0  0  0  0  0  0  0  0  0  0  0
   -0.4935   -1.3468   -1.4005 C   0  0  0  0  0  0  0  0  0  0  0  0
    0.7113   -1.9481   -1.4608 N   0  0  0  0  0  0  0  0  0  0  0  0
    1.2470   -2.3871   -2.7517 C   0  0  0  0  0  0  0  0  0  0  0  0
   -2.2728    0.9202   -0.9490 O   0  0  0  0  0  0  0  0  0  0  0  0
   -1.0945   -1.0893   -2.4219 O   0  0  0  0  0  0  0  0  0  0  0  0
    2.7676   -2.5244   -2.6528 C   0  0  0  0  0  0  0  0  0  0  0  0
    0.6452   -3.7192   -3.1185 C   0  0  0  0  0  0  0  0  0  0  0  0
    0.9935   -4.3211   -4.2730 N   0  0  0  0  0  0  0  0  0  0  0  0
    3.3805   -1.1670   -2.4225 C   0  0  0  0  0  0  0  0  0  0  0  0
    4.7036   -1.0556   -2.1912 N   0  0  0  0  0  0  0  0  0  0  0  0
    0.4085   -5.6160   -4.6296 C   0  0  0  0  0  0  0  0  0  0  0  0
    1.2143   -6.7381   -3.9720 C   0  0  0  0  0  0  0  0  0  0  0  0
    1.1828   -6.5654   -2.4521 C   0  0  0  0  0  0  0  0  0  0  0  0
   -0.0495   -6.9099   -6.6874 N   0  0  0  0  0  0  0  0  0  0  0  0
    0.4395   -5.7861   -6.1266 C   0  0  0  0  0  0  0  0  0  0  0  0
    2.0755   -7.5963   -1.8107 C   0  0  0  0  0  0  0  0  0  0  0  0
    2.2048   -7.6353   -0.4697 N   0  0  0  0  0  0  0  0  0  0  0  0
   -2.0392   -5.8677   -8.0375 O   0  0  0  0  0  0  0  0  0  0  0  0
   -1.2326   -6.4177   -8.7483 C   0  0  0  0  0  0  0  0  0  0  0  0
   -0.0193   -7.0752   -8.1427 C   0  0  0  0  0  0  0  0  0  0  0  0
   -1.3807   -6.4384   -9.8179 H   0  0  0  0  0  0  0  0  0  0  0  0
   -1.3437   -9.1911   -8.0357 C   0  0  0  0  0  0  0  0  0  0  0  0
   -0.0221   -8.5661   -8.4868 C   0  0  0  0  0  0  0  0  0  0  0  0
    0.9046   -4.9118   -6.8268 O   0  0  0  0  0  0  0  0  0  0  0  0
    2.6776   -8.3909   -2.5013 O   0  0  0  0  0  0  0  0  0  0  0  0
   -0.1527   -4.2495   -2.3748 O   0  0  0  0  0  0  0  0  0  0  0  0
    2.6833   -0.1750   -2.4454 O   0  0  0  0  0  0  0  0  0  0  0  0
    0.1350   -8.7409   -9.9986 C   0  0  0  0  0  0  0  0  0  0  0  0
    0.6437   -8.0012   -4.3197 O   0  0  0  0  0  0  0  0  0  0  0  0
  -13.4947    3.9016    6.7837 C   0  0  0  0  0  0  0  0  0  0  0  0
  -12.8300    3.6570    5.4276 C   0  0  0  0  0  0  0  0  0  0  0  0
  -11.4195    3.1048    5.6431 C   0  0  0  0  0  0  0  0  0  0  0  0
  -10.7548    2.8602    4.2869 C   0  0  0  0  0  0  0  0  0  0  0  0
   -9.3443    2.3080    4.5025 C   0  0  0  0  0  0  0  0  0  0  0  0
   -8.6796    2.0634    3.1463 C   0  0  0  0  0  0  0  0  0  0  0  0
   -7.2691    1.5111    3.3619 C   0  0  0  0  0  0  0  0  0  0  0  0
   -6.6044    1.2666    2.0057 C   0  0  0  0  0  0  0  0  0  0  0  0
   -5.1939    0.7143    2.2213 C   0  0  0  0  0  0  0  0  0  0  0  0
   -4.5292    0.4698    0.8651 C   0  0  0  0  0  0  0  0  0  0  0  0
   -3.1187   -0.0825    1.0806 C   0  0  0  0  0  0  0  0  0  0  0  0
  1  2  1  0      
  2  3  1  0      
  3  4  1  0      
  4  5  1  0      
  1  6  1  0      
  3  7  2  0      
  5  8  1  0      
  5  9  1  0      
  9 10  1  0      
  8 11  1  0      
 11 12  1  0      
 10 13  1  0      
 13 14  1  0      
 14 15  1  0      
 16 17  1  0      
 17 13  1  0      
 15 18  1  0      
 18 19  1  0      
 20 21  2  0      
 21 22  1  0      
 22 16  1  0      
 21 23  1  0      
 24 25  1  0      
 22 25  1  0      
 17 26  2  0      
 18 27  2  0      
  9 28  2  0      
 11 29  2  0      
 25 30  1  0      
 14 31  1  0      
  1 42  1  0      
 32 33  1  0      
 33 34  1  0      
 34 35  1  0      
 35 36  1  0      
 36 37  1  0      
 37 38  1  0      
 38 39  1  0      
 39 40  1  0      
 40 41  1  0      
 41 42  1  0      
M  STY  1   1 SUP
M  SLB  1   1   1
M  SAL   1 11  32  33  34  35  36  37  38  39  40  41  42
M  SBL   1  1  31
M  SMT   1 C11H23
M  SBV   1 31   -4.5087    5.7544
M  END
$$$$
